# Supplementary material
Source: PubMed Central journal article supplement (PMC4144761)
Supplement: mp500203e_si_001.pdf [file mp500203e_si_001.pdf]

## SUPPORTING INFORMATION

### Enhanced Cellular Uptake of Short Polyarginine Peptides through Fatty Acylation and Cyclization

Donghoon Oh,<sup>a</sup> Amir Nasrolahi Shirazi,<sup>a,b</sup> Kevin Northup,<sup>a</sup> Brian Sullivan,<sup>a</sup> Rakesh Kumar

Tiwari,<sup>a,b</sup> Marco Bisoffi,<sup>b</sup> Keykavous Parang<sup>a,b,\*</sup>

<sup>a</sup>Department of Biomedical and Pharmaceutical Sciences, College of Pharmacy, University of Rhode Island, Kingston, RI 02881, United States

<sup>b</sup>Chapman University School of Pharmacy, Irvine, CA, 92618, United States

kparang@uri.edu

**TITLE RUNNING HEAD.** Fatty Acylated Cyclic Polyarginine as Molecular Transporter

\*Corresponding author:

Harry and Diane Rinker Health Science Campus, 9401 Jeronimo Road, Chapman University School of Pharmacy, Irvine, California 92618, United States; Tel.: +1-714-516-5489; Fax: +1-714-516-5481; Email: [parang@chapman.edu](mailto:parang@chapman.edu)

| <b>Table of Contents</b>                                                                    | <b>Page</b> |
|---------------------------------------------------------------------------------------------|-------------|
| Cytotoxicity Assays of W <sub>4</sub> -[R <sub>5</sub> ] and W-dodecanoyl-[R <sub>5</sub> ] | <b>S3</b>   |
| Comparison of Serum Stability of Linear and Cyclic Acylated Polyarginine Peptides           | <b>S3</b>   |
| Cell Culture                                                                                | <b>S5</b>   |
| Time-Dependent Antiproliferative Assay.                                                     | <b>S5</b>   |

## Cytotoxicity Assays of W<sub>4</sub>-[R<sub>5</sub>] and W-dodecanoyl-[R<sub>5</sub>]

The cytotoxicity assays of cyclic peptide [R<sub>5</sub>] having tryptophan residues were carried out against CCRF-CEM, SK-OV-3, and HEK 293T cell lines. The assay protocol was the same as described in the experimental section. The cytotoxic assay results are shown in Figure S1. The tryptophan modified peptides, W<sub>4</sub>-[R<sub>5</sub>] and W-dodecanoyl-[R<sub>5</sub>], showed  $\geq 89\%$  cell viability up to concentration of 10  $\mu\text{M}$  against CCRF-CEM,  $\geq 74\%$  viability up to 15  $\mu\text{M}$  against SK-OV-3, and  $\geq 86\%$  viability up to 10  $\mu\text{M}$  against HEK 293T cell lines.

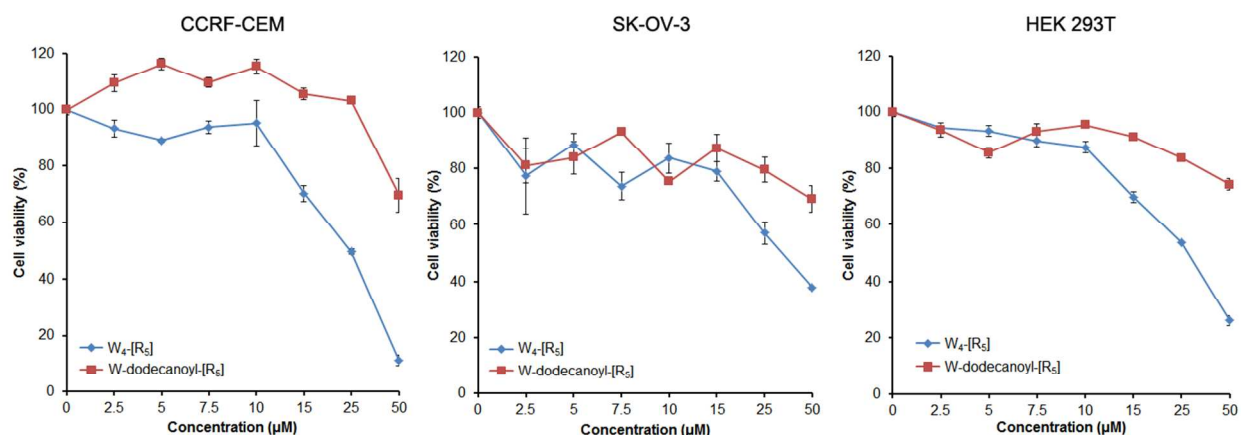

**Figure S1.** Cytotoxicity assay of W<sub>4</sub>-[R<sub>5</sub>] and W-dodecanoyl-[R<sub>5</sub>] having tryptophan residues at various concentrations against CCRF-CEM, SK-OV-3, and HEK 293T after 24 h.

## Comparison of Serum Stability of Linear and Cyclic Acylated Polyarginine Peptides.

Serum stability assay was performed with linear dodecanoyl-(R<sub>5</sub>) and cyclic dodecanoyl-[R<sub>5</sub>] in mammalian serum. The assay protocol was adapted from serum stability study of peptides.<sup>1,2</sup>

Fetal bovine serum (FBS, 25%) was prepared in water and centrifuged at 13,000 rpm for 10 min, and the supernatant was collected and used for sample preparation. Peptide stock solution (1

mg/mL) was prepared in water, and 10  $\mu$ L of this aqueous stock solution was added to 100  $\mu$ L of 25% FBS. The samples were incubated at 37  $^{\circ}$ C. Samples were taken at 0, 1, 2, 4, and 9 h, and serum protein were precipitated by addition of 20  $\mu$ L of 15% trichloroacetic acid aqueous solution. The samples were kept at 4  $^{\circ}$ C for at least 15 min before centrifugation at 13,000 rpm for 10 min. The supernatant was analyzed by an HPLC equipped with a reverse-phase C<sub>18</sub> column (5  $\mu$ m, 4.6  $\times$  150 mm) at UV 215 nm wavelength. Water with 0.1% trifluoroacetic acid (TFA) was used as mobile phase A and acetonitrile with 0.1% TFA was used as mobile phase B. A gradient with 0-100% acetonitrile with 0.1% TFA was applied to the HPLC system with a flow rate at 1.2 mL/min. The relative % peptide remaining amount was calculated by setting 0 h sample as 100%. The stability assay results were presented in Figure S2. The cyclic peptide was remained stable by 92% after 9 h incubation with 25% FBS, but the linear peptide was degraded completely even after 1 h. Thus, cyclic acylated polyarginine peptide is significantly more stable than the linear acylated polyarginine peptide against mammalian serum.

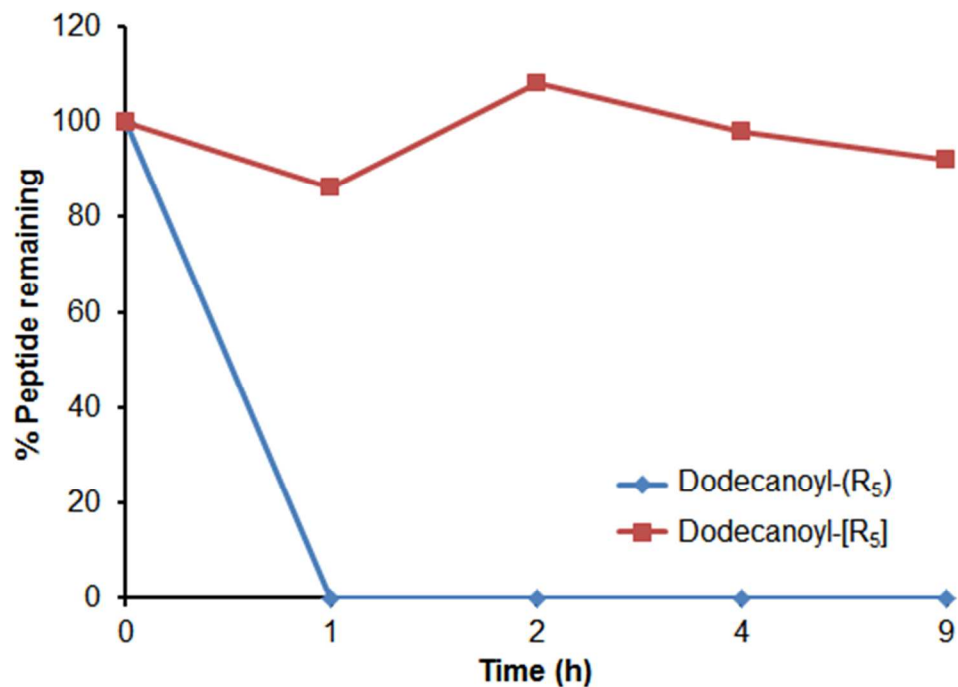

**Figure S2.** Serum stability of linear dodecanoyl-(R<sub>5</sub>) and cyclic dodecanoyl-[R<sub>5</sub>] peptides in fetal bovine serum. Samples were incubated at 37 °C and taken at 0, 1, 2, 4, and 9 h.

**Cell Culture.** Human ovarian adenocarcinoma (SK-OV-3), breast (MCF-7), leukemia (CCRF-CEM), and embryonic kidney (HEK 293T) cells were purchased from American Type Culture Collection. The SK-OV-3 and HEK 293T cells were grown in eagle’s minimum essential medium (EMEM), and RPMI-1640 medium (ATCC, Manassas, VA) was used for CCRF-CEM cells. MCF-7 cells were grown in DMEM medium (Sigma). All medium were supplemented with fetal bovine serum (FBS, 10%) and penicillin-streptomycin solution (1%, 10,000 units of penicillin and 10 mg of streptomycin in 0.9% NaCl) in a humidified atmosphere of 5% CO<sub>2</sub> at 37 °C.

**Time-Dependent Antiproliferative Assay.** The inhibitory potency of Dox against MCF-7 cells proliferation was evaluated in the presence and absence of [R<sub>6</sub>]-C<sub>12</sub> by MTS assay. All cells were plated 24 h prior to the experiment in 96-well plates (5000 cells in 0.1 mL of appropriate growth medium per well) at 37 °C. Cells were incubated with Dox alone (5 μM) and Dox-loaded [R<sub>6</sub>]-C<sub>12</sub> (5 μM) for 1 h. After 1 h incubation, the treatments were replaced by fresh complete medium.

The cells were kept in an incubator for 24–72 h. The cells with no treatment were used as a control in each experiment. After 24 h, 48 h, and 72 h incubation, 20  $\mu$ L of MTS solution was added and incubated for 2 h. The absorbance of the formazan product was measured at 490 nm using a microplate reader. The percentage of cell viability was calculated as (OD value of untreated cells – OD value of treated cells)/OD value of untreated cells  $\times$  100%.

## References

- (1) Cudic, M.; Condie, B. A.; Weiner, D. J.; Lysenko, E. S.; Xiang, Z. Q.; Insug, O.; Bulet, P.; Otvos, L., Jr. *Peptides* **2002**, *23*, 2071–2083.
- (2) Nguyen, L. T.; Chau, J. K.; Perry, N. A.; de Boer, L.; Zaat, S. A. J.; Vogel, H. J. *PLoS ONE* **2010**, *5*, e12684.
